# Supplementary material
Source: ML conference proceedings conference paper supplement (https://openreview.net/forum?id=xI5660uFUr)
Supplement: supplementary_material [file attachment]

MSE-optimized SCR on Hyperprior

| PSNR     | bpp      |
|----------|----------|
| 27.96127 | 0.152281 |
| 29.59536 | 0.231059 |
| 31.32065 | 0.344961 |
| 33.13944 | 0.500168 |
| 35.10197 | 0.7086   |
| 37.06591 | 0.974435 |
| 38.91485 | 1.306873 |
| 40.47489 | 1.682961 |

MSE-optimized SCR on Hyperprior (w/o selective compression)

| PSNR     | bpp      |
|----------|----------|
| 27.90627 | 0.174703 |
| 29.62624 | 0.256983 |
| 31.42826 | 0.3756   |
| 33.31465 | 0.536075 |
| 35.26993 | 0.743298 |
| 37.20506 | 1.006851 |
| 38.98448 | 1.327855 |
| 40.46066 | 1.683533 |

MSE-optimized SCR on Mean-scale

| PSNR     | bpp      |
|----------|----------|
| 28.23148 | 0.141815 |
| 29.76618 | 0.215108 |
| 31.40989 | 0.321825 |
| 33.16884 | 0.468952 |
| 35.07227 | 0.670688 |
| 37.088   | 0.938666 |
| 39.00991 | 1.273017 |
| 40.58951 | 1.643461 |

MSE-optimized SCR on Mean-scale (w/o selective compression)

| PSNR     | bpp      |
|----------|----------|
| 28.03302 | 0.153661 |
| 29.64762 | 0.231445 |
| 31.33951 | 0.342148 |
| 33.1321  | 0.492874 |
| 35.15988 | 0.701944 |
| 37.12421 | 0.962438 |
| 38.96923 | 1.279422 |
| 40.5584  | 1.649887 |

MSE-optimized SCR on Context

| PSNR     | bpp      |
|----------|----------|
| 28.52745 | 0.144527 |
| 30.12381 | 0.220964 |
| 31.84175 | 0.332577 |
| 33.55983 | 0.48322  |
| 35.44041 | 0.681092 |
| 37.28996 | 0.936017 |
| 39.08377 | 1.25755  |
| 40.67886 | 1.627366 |

MSE-optimized SCR on Context (w/o selective compression)

| PSNR     | bpp      |
|----------|----------|
| 28.56484 | 0.151498 |
| 30.08014 | 0.224844 |
| 31.87283 | 0.3436   |
| 33.73306 | 0.503708 |
| 35.62359 | 0.712532 |
| 37.50217 | 0.97688  |
| 39.28847 | 1.30221  |
| 40.81121 | 1.676807 |
