# Supplementary material
Source: ML conference proceedings conference paper supplement (https://openreview.net/forum?id=xI5660uFUr)
Supplement: supplementary_material [file attachment]

MS-SSIM-optimized Hyperprior (reproduced)

| MS-SSIM  | bpp      |
|----------|----------|
| 0.948514 | 0.159609 |
| 0.96996  | 0.259023 |
| 0.981517 | 0.381554 |
| 0.987325 | 0.522451 |
| 0.992135 | 0.738805 |
| 0.99494  | 1.000971 |
| 0.996875 | 1.38276  |
| 0.998069 | 1.896362 |

MS-SSIM-optimized SCR on Hyperprior

| MS-SSIM  | bpp      |
|----------|----------|
| 0.960601 | 0.208989 |
| 0.973942 | 0.294417 |
| 0.983026 | 0.407854 |
| 0.988895 | 0.558314 |
| 0.992636 | 0.756895 |
| 0.995129 | 1.018673 |
| 0.99678  | 1.377062 |
| 0.997816 | 1.81949  |

MS-SSIM-optimized SCR on Hyperprior (w/o selective compression)

| MS-SSIM  | bpp      |
|----------|----------|
| 0.958759 | 0.219412 |
| 0.973481 | 0.308894 |
| 0.982588 | 0.42159  |
| 0.988422 | 0.569765 |
| 0.992512 | 0.777707 |
| 0.995272 | 1.060694 |
| 0.996898 | 1.406776 |
| 0.99786  | 1.820329 |

MS-SSIM-optimized Mean-scale (reproduced)

| MS-SSIM  | bpp      |
|----------|----------|
| 0.953266 | 0.157833 |
| 0.971177 | 0.251647 |
| 0.981845 | 0.366926 |
| 0.987831 | 0.509363 |
| 0.992175 | 0.703231 |
| 0.99507  | 0.987049 |
| 0.996936 | 1.365573 |
| 0.99812  | 1.865629 |

MS-SSIM-optimized SCR on Mean-scale

| MS-SSIM  | bpp      |
|----------|----------|
| 0.960688 | 0.196264 |
| 0.973405 | 0.278281 |
| 0.983213 | 0.389938 |
| 0.988598 | 0.530365 |
| 0.992562 | 0.732873 |
| 0.995172 | 1.00198  |
| 0.996851 | 1.359994 |
| 0.997888 | 1.819355 |

MS-SSIM-optimized SCR on Mean-scale (w/o selective compression)

| MS-SSIM  | bpp      |
|----------|----------|
| 0.956936 | 0.19957  |
| 0.972903 | 0.284892 |
| 0.982622 | 0.396576 |
| 0.988478 | 0.543648 |
| 0.992467 | 0.747143 |
| 0.995228 | 1.025275 |
| 0.996969 | 1.384761 |
| 0.997949 | 1.809094 |

MS-SSIM-optimized Context (reproduced)

| MS-SSIM  | bpp      |
|----------|----------|
| 0.953453 | 0.159279 |
| 0.971829 | 0.242371 |
| 0.982576 | 0.359024 |
| 0.988431 | 0.505658 |
| 0.992433 | 0.699192 |
| 0.995179 | 0.991789 |
| 0.996991 | 1.37345  |
| 0.99816  | 1.845389 |

MS-SSIM-optimized SCR on Context

| MS-SSIM  | bpp      |
|----------|----------|
| 0.963986 | 0.195401 |
| 0.976518 | 0.28165  |
| 0.984564 | 0.396125 |
| 0.989861 | 0.552108 |
| 0.99351  | 0.770142 |
| 0.995861 | 1.061495 |
| 0.99731  | 1.433148 |

|          |          |
|----------|----------|
| 0.998176 | 1.874051 |
|----------|----------|

MS-SSIM-optimized SCR on Context (w/o selective compression)

| MS-SSIM  | bpp      |
|----------|----------|
| 0.964424 | 0.202535 |
| 0.976634 | 0.287666 |
| 0.984596 | 0.40135  |
| 0.989856 | 0.558242 |
| 0.993494 | 0.774837 |
| 0.99585  | 1.067165 |
| 0.997285 | 1.431255 |
| 0.998145 | 1.870984 |
